# Supplementary material for: Glucocorticoids may compromise the effect of gefitinib in non-small cell lung cancer
Source: PubMed Central journal article supplement (PMC5349885; doi:10.18632/oncotarget.13185), 2016-11-07
Supplement: oncotarget-07-85917-s001.pdf [file oncotarget-07-85917-s001.pdf]

## Glucocorticoids may compromise the effect of gefitinib in non-small cell lung cancer

### Supplementary Materials

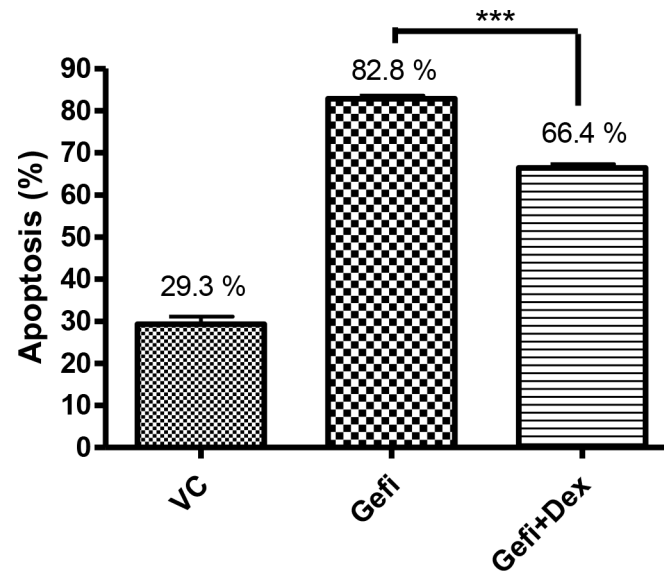

**Supplementary Figure S1: Dexamethasone significantly lowered apoptosis induction in NCI-H3255 cells treated by gefitinib.** NCI-H3255 cells were treated by gefitinib at 90 nM ( $IC_{80}$ ) or in combination with dexamethasone, 1  $\mu$ M. Three independent repeat tests were performed. Abbreviation: VC, vehicle control; Gefi, gefitinib; Dex, dexamethasone. \*\*\* $p < 0.001$ .

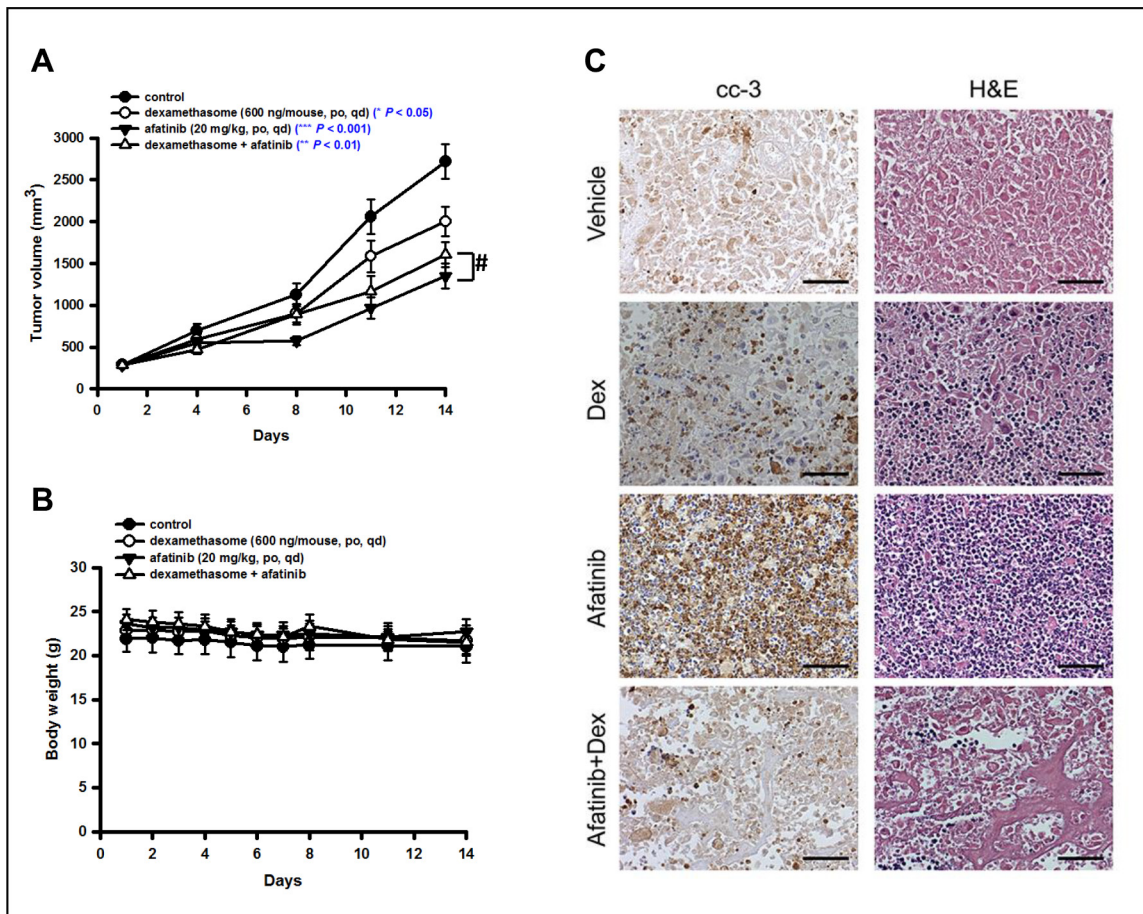

**Supplementary Figure S2: Anti-cancer activity of dexamethasone in combination with afatinib in human non-small cell lung cancer NCI-H1975 xenograft model.** (A) Nude mice were daily treated with vehicle (DMSO), afatinib (20 mg/kg), dexamethasone (600 ng/mouse) or afatinib (20 mg/kg) co-administered with dexamethasone (600 ng/mouse) by oral gavage for 14 days. Ten mice per group were used in the xenograft experiment. \* $p < 0.05$  and \*\* $p < 0.01$  compared to control; # $p < 0.05$ . (B) Body weight of the NCI-H1975 tumor bearing mice under the treatment during the study. The data represent mean  $\pm$  SEM from ten mice in each group. (C) Apoptosis in NCI-H1975 xenograft tumors. At the end of 14-day drug treatment, apoptotic cells in tumors were characterized by cytoplasmic shrinkage and nuclear chromatin condensation in H&E staining and were positive for cleaved caspase 3 positive cells (shown as brown). Scale bars, 50  $\mu$ m. cc-3, cleaved caspase 3.

**Supplementary Table S1: NCI-H1975 cells treated with different EGFR-TKI alone or in combination with dexamethasone (apoptosis %)**

| Dex.                | Non-Dex             | Dex (1 $\mu$ M)    |
|---------------------|---------------------|--------------------|
| EGFR-TKI            |                     |                    |
| Non-TKI             | 9.6 ( $\pm$ 1.7)* % | 3.1 ( $\pm$ 1.0) % |
| AZD9291 (1 $\mu$ M) | 36.3 ( $\pm$ 2.5) % | 5.6 ( $\pm$ 1.4) % |
| CO1686 (1 $\mu$ M)  | 22.7 ( $\pm$ 3.6) % | 5.5 ( $\pm$ 0.9) % |

Dex.: dexamethasone.

\*mean ( $\pm$ 2SD)
